# Heat inactivating and reusing of virus-contaminated disposable medical mask

Running title: Inactivating virus-contaminated medical mask for reuse

Wuhui Song<sup>1#</sup>, Bin Pan<sup>2#</sup>, Haidong Kan<sup>2</sup>, Yanyi Xu<sup>2\*</sup>, Zhigang Yi<sup>1,3\*</sup>

1.Key Laboratory of Medical Molecular Virology (MOE/NHC/CAMS), School of  
Basic Medical Sciences, Fudan University , Shanghai 200032, China

2.Department of Environmental Health, School of Public Health, Fudan University,  
Shanghai 200032, China

3. Shanghai Public Health Clinical Center, Fudan University, Shanghai 200032, China

# Co-first authors

\* Corresponding authors: yanyi\_xu@fudan.edu.cn; zgyi@fudan.edu.cn

138 YiXueYuan Road, Shanghai 200032, People's Republic of China

**Key words:** Heat inactivation; Medical mask; Filterability; Influenza virus; 2019  
novel coronavirus

NOTE: This preprint reports new research that has not been certified by peer review and should not be used to guide clinical practice.

## 24    **Abstract:**

25            As the prevalence of COVID-19 in all the area of China and continuous spread to  
 26    many other countries, it is in urgent need of medical mask for community people. We  
 27    have reported a simple method to inactivate artificially influenza virus-contaminated  
 28    medical mask without affecting the filterability of mask by heating with hair dryer for  
 29    30min. In this study, we extended our studies to optimize our protocols and evaluate  
 30    the filterability of mask after several-rounds of heat treatment. We found that baking  
 31    at 70°C for 30min almost completely inactivated virus as hair dryer treatment for  
 32    30min described before. One-round of heat treatment with hair dryer for 30min or  
 33    baking at 70°C for 30min did not affect filterability of mask whilst two-rounds of  
 34    treatment slightly but significantly reduced filterability of mask. Thus, heating with  
 35    hair dryer for 30min or baking at 70°C for 30min can inactive contaminated medical  
 36    mask and the treated mask can be reused at least once.

37

38

## 39 **Introduction:**

40 Since the outbreak of COVID-19 in Wuhan China, it was endemic to all over the  
 41 China within less than one month, causing over 80000 cases and over 3000 mortalities  
 42 in China. It is considered to have pandemic potential, as it has been spread to almost  
 43 all the continents and has caused over 20000 cases outside China. COVID-19 is  
 44 caused by infection with a novel coronavirus SARS-CoV-2<sup>1-3</sup>, and its  
 45 human-to-human transmission occurs mainly through close contacts<sup>4</sup>. Personal  
 46 protective equipment (PPE) like medical mask is critical for public to prevent the  
 47 infection of COVID-19. Thus it is in urgent need of medical mask all over the world.  
 48 However, there is global shortage of medical mask. Medical mask acts similarly as  
 49 N95 respirators for preventing Influenza virus infection<sup>5</sup>. Re-use of disposable  
 50 medical mask would alleviate the panic of shortage of mask. Prior to re-use of mask,  
 51 we should inactivate potential contaminated virus on the mask. Heat inactivation of virus  
 52 such as incubating at 56°C for 30min is widely accepted to be able to inactivate  
 53 enveloped virus like influenza virus and coronavirus. And importantly, heating at  
 54 70 °C for 24 hour does not significantly change the filtration efficiency of  
 55 polypropylene (PP)<sup>6</sup>, a core matrix for medical mask, whereas conventional  
 56 disinfectant like ethanol dramatically destroys filter performance of polypropylene  
 57 electret filters<sup>7</sup>. We have developed a simple method to inactivate medical mask that  
 58 is artificially contaminated by influenza virus via heating with hair dryer for 30min  
 59 without affecting its filterability<sup>8</sup>, which can be easily adapted by public. In this study,

60 we extended our studies to optimize our protocols by shortening treatment intervals  
 61 with hair dryer and baking mask at different temperatures. We demonstrated that hair  
 62 dryer treatment for 15 min did not effectively inactivate influenza virus (IVA) on  
 63 medical mask compared with 30 min as described before. And that baking at 70°C for  
 64 30 min effectively inactivated IVA on mask whereas baking at 65°C for 30 min did  
 65 not. We also evaluated the filterability of mask after several-rounds of heat treatment.  
 66 Our results reveal that two-rounds of treatment with hair dryer for 30min or baking at  
 67 70°C for 30min significantly reduced filterability of mask but one-round of treatment  
 68 did not affect filterability of mask. Thus, we provided a simple method for reuse of  
 69 disposable medical mask, which may help tackle the urgent need of medical mask  
 70 during COVID-19 prevalence.

71

## **Materials and Methods**

### **Cell and virus**

Madin-Darby canine kidney (MDCK) cells were purchased from Cell Bank of the Chinese Academy of Sciences, Shanghai, China ([www.cellbank.org.cn](http://www.cellbank.org.cn)) and maintained in Dulbecco's modified medium supplemented with 10% FBS (Gibco) and 25mM HEPES (Gibco) with non-essential amino acids (Gibco). Influenza A(H1N1) A/PR8 were purchase from ATCC and propagated in MDCK cells.

### **Heat treatment of medical mask**

Medical mask was mock-contaminated by dropping a 10 $\mu$ l of IVA solution containing  $3.6 \times 10^5$  pfu of IVA in 3 different sites on medical mask where each site was marked with a square. Due to the hydrophobic property of mask, liquid drop is difficult be absorbed onto the surface of the mask. The virus drop was doted on between the kink marks of the mask. Then the mask was wrapped with a food storage bag and then heat treated with hair dryer (1400w, 50Hz) by moving around over the surface of the wrapped mask vertically at a distance of about 10~20cm. Alternatively, the wrapped mask was moved into baking oven and treated at indicated temperatures with various intervals.

### **Rescue of the virus from mask**

After heat treatment, the traces of IVA drop were visible within the marked squares. Due to the hydrophobic property of mask, the virus within the marked squares could be easily rescued by pipetting 250 $\mu$ l of Viral Transport Media (Hank's Balanced Salt Solution (1X HBSS) supplemented with 0.1% bovine serum albumin (BSA), 100 units/ml penicillin G and 100 units/ml streptomycin)<sup>9</sup> onto the traces until

the traces disappear, then 125µl of the rescued virus was used for infecting naïve MDCK cells in the presence of 5µg/ml TPCK-trypsin (sigma) for 1 hour at 37°C in a cell culture incubator. After wash with DMEM media for 4 times, fresh DMEM media with 1µg/ml TPCK-trypsin was added. At indicated time points post infection, the supernatants were collected.

#### **Viral RNA quantification**

The RNAs in the supernatants from the infected MDCK cells were extracted by QIAamp Viral RNA kit (Qiagen) according to the manufacturers' protocol. RNAs were eluted in H<sub>2</sub>O and quantified by a Taqman-based real time PCR with One Step PrimeScript RT-PCR kit (Takara) according to the manufacturers' protocol with 400nM of each primer (sense primer: CTT CTA ACC GAG GTC GAA ACG TA, anti-sense primer: GGT GAC AGG ATT GGT CTT GTC TTT A) and 200nM of probe (FAM-TCA GGC CCC CTC AAA GCC GAG-BHQ1). The relative RNA levels were calculated by  $2^{-\Delta CT}$  method<sup>10</sup>.

#### **PM<sub>2.5</sub> filterability measurement**

A suction flask (Shuniu, 250mL, GG-17) together with the particulate matter monitor (TSI, AM510) were used to evaluate the PM<sub>2.5</sub> filterability of medical masks (YINUO, FE3) before and after heat treatment. Considering the effect of suction process on the filtration performance of the masks, 5 experimental groups were set up as following: 1). Untreated group (clean unused masks without any treatment); 2). One-round use + baking group (masks are used under normal condition for 4 hours and then baked in oven at 70°C for 30min); 3). Two-round use+ baking group (masks

117 are used under normal condition for 8 hours, with incubation in oven at 70°C for  
 118 30min every 4 hours); 4). One-round use + hair dryer group (masks are used under  
 119 normal condition for 4 hours and then heat treated by hair dryer for 30min as  
 120 described above); 5). Two-round use + hair dryer group (masks are used under normal  
 121 condition for 8 hours, with heat treatment by air dryer for 30min every 4 hours).  
 122 Masks ( $N=3$ /group) were tightly bound to the top of the suction flask, while the  
 123 particulate matter monitor was used to detect the  $PM_{2.5}$  concentrations near the top  
 124 and the side outlet of the flask. The total suction filtration process lasted for 4 hours,  
 125 and the tested flow rate is 1.8 L/min.  $PM_{2.5}$  concentrations were recorded every 30min,  
 126 and repeated for 3 times at each time point.

127

## Results

### Heat inactivation of IVA on mock-contaminated medical mask

In our previous study, baking at 56°C for 30 min only partially inactivated IVA on medical mask, with a 1~3 log reduction of viral RNA level, comparing to 6 log reduction of viral RNA level after hair dryer treatment for 30 min<sup>8</sup>. In the present study, we first increased baking temperature and treated IVA mock-contaminated medical mask at 65°C for 30 min. After treatment, the virus on the mask was rescued and used to re-infect MDCK cells. Then we collected the supernatants of the infected cells at 0 and 48 hours post infection and quantified the viral RNA levels by real-time PCR. The inactivation efficiency was assessed by reduction of the viral RNA level comparing to the un-treated group. Baking at 65°C for 30 min resulted in 2~5 log reduction of viral RNA level but did not reduce viral RNA level to basal level (level at 0 hour post infection) (Fig 1A). Hair dryer treatment for 30 min nearly completely inactive IVA on medical mask<sup>8</sup>, while for convenience, we sought to shorten the treatment intervals. We assessed the inactivation efficiency of hair dryer treatment for 5, 10 and 15 min as described above. As shown in Figure 1A, hair dryer treatment for 5, 10 and 15 min did not effectively inactive IVA.

Then we continued to optimize baking conditions and increase temperature to 70°C. We treated IVA-contaminated medical mask at 70°C for 15 min and 30 min and assessed the viral replication level of the rescued virus. As shown in Figure 1B, baking at 70°C for 15 min and 30 min both effectively reduced viral RNA levels to nearly basal levels and treatment for 30 min was more effective than treatment for 15min. Thus heat treatment with hair dryer for 30min<sup>8</sup> and baking at 70°C for 30 min both effectively inactive IVA-contaminated medical mask.



## **PM<sub>2.5</sub> filterability of medical masks after heat treatment**

We assessed protective function of medical mask by measuring the filterability of medical masks to ambient PM<sub>2.5</sub> after similar heat treatment as described before<sup>8</sup>. To evaluate the recycle times of the medical mask, masks were subjected to several rounds of wear (use) and heat treatment. Masks were used under normal condition for 4 hours followed by treatment with hair dryer for 30min or baking at 70°C for 30 min, and then subjected to a 4-hour suction process mimicking the usage scenario by an adult under normal condition. As demonstrated in Figure 2A, PM<sub>2.5</sub> filtration rate of all the tested disposable medical masks was slightly changed during the 4-hour suction process. In general, the filterability remained stable with PM<sub>2.5</sub> filtration rate above 85% at all the tested time points. Among all the experimental groups, masks that have been used and heat treated once (by baking or hair dryer) have similar 4-hour average PM<sub>2.5</sub> filtration rate compared to the untreated ones (Figure 2B). However, after being used and heat-treated twice (by baking or hair dryer), their filtration efficiency was significantly reduced as shown in Figure 2B. Our results indicate that heat inactivation by baking or hair dryer for 30 min may serve as an effective way for reuse of disposable medical masks, but this method is not encouraged to be used for more than once.

## Discussion

It is not suggested to reuse disposable medical mask, especially for people who are in close contact with patients, medical staffs and laboratory technicians. But for community people who are at relative low risk of contacting high dosage of SARS-CoV-2, it is plausible to reuse medical mask after reliable inactivating treatment during the COVID-19 prevalence, which may alleviate the heavily global shortage of medical mask. We used IVA to mimic SARS-CoV-2 as they transmit similarly and both have envelopes and mock contaminated medical mask by dotting IVA drops onto the mask, then inactivated the IVA on medical mask by convenient heat treatment with hair dryer and baking that are easily to be adapted by community people. We found that baking at 70°C for 30min almost completely inactivated virus as hair dryer treatment for 30min described before<sup>8</sup>. But baking at 56°C and 65°C for 30min could not effectively activate virus<sup>8</sup>(Fig. 1A). Incubating at 56°C for 30min is a widely used protocol to inactivate influenza virus or coronavirus in solution. The incomplete inactivation by baking at this temperature and at 65°C indicates that baking a surface has less efficiency than incubating in solution. Maintaining the filter function of medical mask during usage is critical for preventing virus infection. We demonstrated that one-round of heat treatment did not affect filterability of mask whilst two-rounds of treatment slightly but significantly reduced filterability of mask. Thus, we provided a simple method for reuse of medical mask by heating with hair dryer for 30min or baking at 70°C for 30min and the treated mask can be reused at least once.

## 193    **Acknowledgements**

194            This work was inspired by professor Yuemei Wen. We are grateful to Chun-fai  
 195    Yung and many other colleagues for their kind suggestions and inputs. This work was  
 196    supported in part by the National Science and Technology Major Project of China  
 197    (2017ZX10103009). Key Emergency Project of Shanghai Science and Technology  
 198    Committee (20411950103). The funders had no role in study design, data collection  
 199    and analysis, decision to publish, or preparation of the manuscript.

## 200    **Conflict of Interest**

201    The authors declare no conflict of interest.

202

## Reference:

1. Zhu N, Zhang D, Wang W, et al. A Novel Coronavirus from Patients with Pneumonia in China, 2019. *The New England journal of medicine*. 2020;382(8):727-733.
2. Zhou P, Yang XL, Wang XG, et al. A pneumonia outbreak associated with a new coronavirus of probable bat origin. *Nature*. 2020.
3. Chen L, Liu W, Zhang Q, et al. RNA based mNGS approach identifies a novel human coronavirus from two individual pneumonia cases in 2019 Wuhan outbreak. *Emerging microbes & infections*. 2020;9(1):313-319.
4. Li Q, Guan X, Wu P, et al. Early Transmission Dynamics in Wuhan, China, of Novel Coronavirus-Infected Pneumonia. *The New England journal of medicine*. 2020.
5. Radonovich LJ, Jr., Simberkoff MS, Bessesen MT, et al. N95 Respirators vs Medical Masks for Preventing Influenza Among Health Care Personnel: A Randomized Clinical Trial. *Jama*. 2019;322(9):824-833.
6. Zhang H, Liu J, Zhang X, Huang C, Jin X. Design of electret polypropylene melt blown air filtration material containing nucleating agent for effective PM2.5 capture. *RSC Adv*. 2018;8:7932-7941.
7. Choi H, Park E, Kim J, Kim S, Lee M. Experimental Study on Charge Decay of Electret Filter Due to Organic Solvent Exposure. *Aerosol Science and Technology*. 2015;49:977-983.
8. Song W, Pan B, Kan H, Xu Y, Yi Z. Evaluation of heat inactivation of virus

225           contamination on medical mask. *Journal of Microbes and Infection*.  
 226           2020;15(1):31-35.

227    9.       Blachere FM, Lindsley WG, McMillen CM, et al. Assessment of influenza  
 228           virus exposure and recovery from contaminated surgical masks and N95  
 229           respirators. *Journal of virological methods*. 2018;260:98-106.

230    10.      Livak KJ, Schmittgen TD. Analysis of relative gene expression data using  
 231           real-time quantitative PCR and the 2(-Delta Delta C(T)) Method. *Methods*.  
 232           2001;25(4):402-408.

233

234

## Figure Legends

### **Figure 1. Assessment of efficiency of heat inactivation of IVA on mask.**

After indicated heat treatment, IVA on the mask was rescued and used to infect naïve MDCK cells. After extensive wash, the supernatants were collected at 0 and 48 hours post infection (H.P.I) and the virus in the supernatants were quantified by q-PCR. The RNA copy levels relative to that of the untreated (48 h) group were calculated and plotted. Mean  $\pm$  SEM are shown (n=3).

### **Figure 2. M<sub>2.5</sub> filterability of disposable medical masks.**

After one-round or two-round use and heat treatment, the filtration rate was measured. A. PM<sub>2.5</sub> filtration rate change during the 4-hour suction process. \* $p$ <0.05 versus untreated group at the same time point, One-way ANOVA; B. Average PM<sub>2.5</sub> filtration rate within the suction process were plotted. \* $p$ <0.05 versus untreated group, One-way ANOVA. Mean  $\pm$  SD are shown (n=3).

**Figure 1**

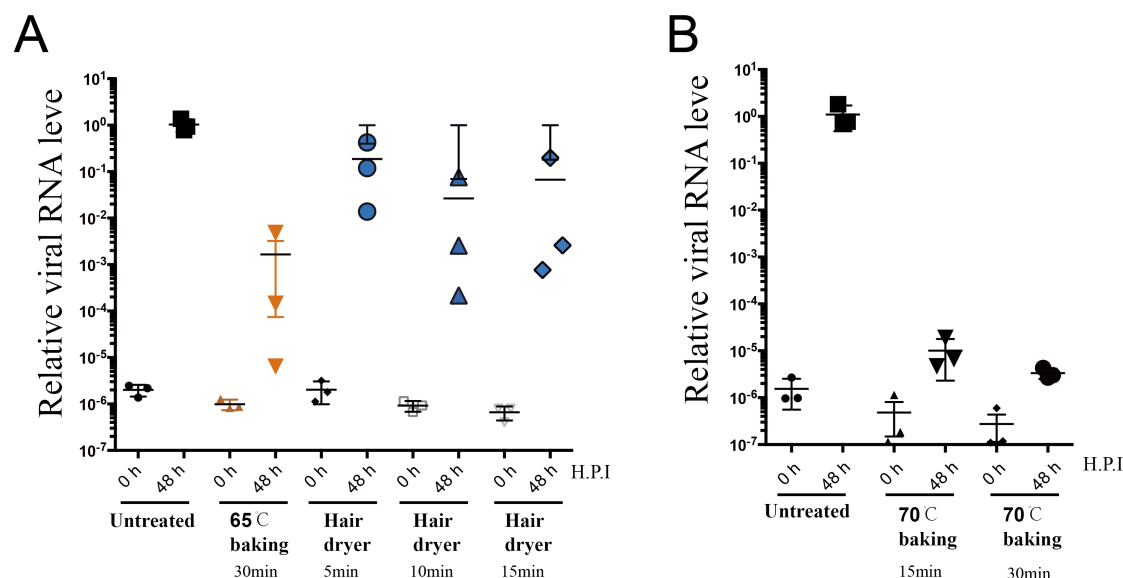

**Figure 1. Assessment of efficiency of heat inactivation of IVA on mask.** After indicated heat treatment, IVA on the mask was rescued and used to infect naïve MDCK cells. After extensive wash, the supernatants were collected at 0 and 48 hours post infection (H.P.I) and the virus in the supernatants were quantified by q-PCR. The RNA copy levels relative to that of the untreated (48 h) group were calculated and plotted. Mean ± SEM are shown (n=3).

**Figure 2**

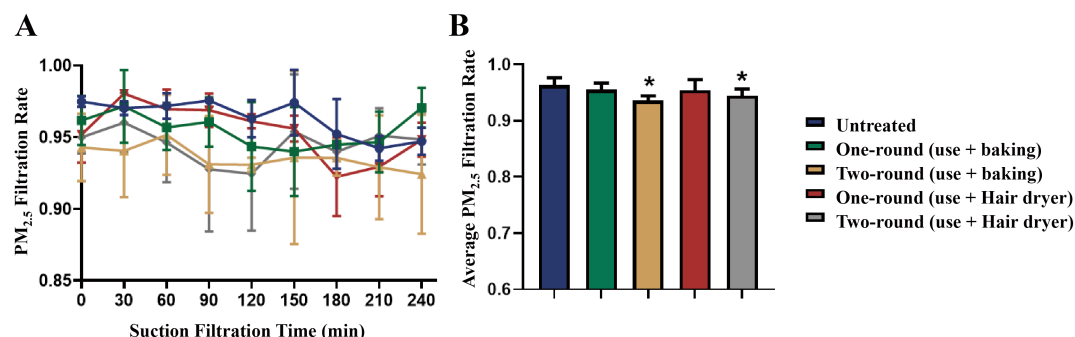

**Figure 2. PM<sub>2.5</sub> filterability of disposable medical masks.** After one-round or two-round use and heat treatment, the filtration rate was measured. A. PM<sub>2.5</sub> filtration rate change during the 4-hour suction process. \* $p < 0.05$  versus untreated group at the same time point, One-way ANOVA; B. Average PM<sub>2.5</sub> filtration rate within the suction process were plotted. \* $p < 0.05$  versus untreated group, One-way ANOVA. Mean  $\pm$  SD are shown (n=3).
